# Supplementary material for: Nanosurface Texturing for Enhancing the Antibacterial Effect of Biodegradable Metal Zinc: Surface Modifications
Source: MDPI journal article supplement (doi:10.3390/nano13132022), 2023-07-07
Supplement: s1 [file s1]

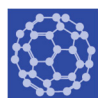

# Nanosurface Texturing for Enhancing the Antibacterial Effect of Biodegradable Metal Zinc: Surface Modifications

Enmao Xiang <sup>1,2</sup>, Corey S. Moran <sup>1,2</sup>, Sašo Ivanovski <sup>1,2,\*</sup> and Abdalla Abdal-hay <sup>1,2,3,4,\*</sup>

<sup>1</sup> School of Dentistry, The University of Queensland, Brisbane 4006, Australia; uqexiang@uq.edu.au (E.X.); corey.moran@uq.edu.au (C.S.M.)

<sup>2</sup> Centre for Orofacial Regeneration, Reconstruction and Rehabilitation (COR3), School of Dentistry, The University of Queensland, Brisbane 4006, Australia

<sup>3</sup> Department of Engineering Materials and Mechanical Design, Faculty of Engineering, South Valley University, Qena 85325, Egypt

<sup>4</sup> Faculty of Industry and Energy Technology, Mechatronics Technology Program, New Cairo Technological University, Fifth Settlement, Cairo 11835, Egypt

\* Correspondence: s.ivanovski@uq.edu.au (S.I.); abdalla.ali@uq.edu.au (A.A.-h.)

**Table S1.** Peak analysis data for XRD of pure untreated, 5% etched, and 15 etched Zn.

|      | Pur | 5%    | 15%   |
|------|-----|-------|-------|-----|-------|-------|-----|-------|-------|-----|-------|-------|-----|-------|-------|
|      | e   | etche | etche |
|      | Zn  | d Zn  | d Zn  |
| 2θ   |     |       |       |     |       |       |     |       |       |     |       |       |     |       |       |
| (°)  |     | d (Å) |       |     | I     |       |     | h     |       |     | K     |       |     | I     |       |
| 36.3 | 2.4 |       |       |     |       |       |     |       |       |     |       |       |     |       |       |
| 7    | 7   | 2.47  | 2.47  | 392 | 392   | 391   | 0   | 0     | 0     | 0   | 0     | 0     | 2   | 2     | 2     |
| 39.0 | 2.3 |       |       |     |       |       |     |       |       |     |       |       |     |       |       |
| 8    | 0   | 2.30  | 2.31  | 236 | 235   | 234   | 1   | 1     | 1     | 0   | 1     | 0     | 0   | 0     | 0     |
| 43.3 | 2.0 |       |       | 100 |       |       |     |       |       |     |       |       |     |       |       |
| 2    | 9   | 2.09  | 2.09  | 0   | 1000  | 1000  | 1   | 1     | 1     | 0   | 1     | 0     | 1   | 1     | 1     |
| 54.4 | 1.6 |       |       |     |       |       |     |       |       |     |       |       |     |       |       |
| 4    | 8   | 1.68  | 1.69  | 146 | 146   | 146   | 1   | 1     | 1     | 0   | 1     | 0     | 2   | 2     | 2     |
| 70.2 | 1.3 |       |       |     |       |       |     |       |       |     |       |       |     |       |       |
| 4    | 4   | 1.34  | 1.34  | 157 | 156   | 155   | 1   | 1     | 1     | 0   | 0     | 0     | 3   | 3     | 3     |

|      |     |      |      |     |     |     |   |   |   |   |   |   |   |   |   |
|------|-----|------|------|-----|-----|-----|---|---|---|---|---|---|---|---|---|
| 70.8 | 1.3 |      |      |     |     |     |   |   |   |   |   |   |   |   |   |
| 0    | 3   | 1.33 | 1.33 | 102 | 101 | 101 | 1 | 1 | 1 | 1 | 1 | 1 | 0 | 0 | 0 |
| 77.2 | 1.2 |      |      |     |     |     |   |   |   |   |   |   |   |   |   |
| 3    | 3   | 1.23 | 1.24 | 24  | 24  | 24  | 0 | 0 | 0 | 0 | 1 | 0 | 4 | 4 | 4 |
| 82.2 | 1.1 |      |      |     |     |     |   |   |   |   |   |   |   |   |   |
| 9    | 7   | 1.17 | 1.17 | 110 | 109 | 110 | 1 | 1 | 1 | 1 | 0 | 1 | 2 | 2 | 2 |
| 83.9 | 1.1 |      |      |     |     |     |   |   |   |   |   |   |   |   |   |
| 7    | 5   | 1.15 | 1.15 | 13  | 13  | 13  | 2 | 2 | 2 | 0 | 0 | 0 | 0 | 0 | 0 |
| 86.7 | 1.1 |      |      |     |     |     |   |   |   |   |   |   |   |   |   |
| 6    | 2   | 1.12 | 1.12 | 67  | 66  | 66  | 2 | 2 | 2 | 0 | 0 | 0 | 1 | 1 | 1 |
| 90.1 | 1.0 |      |      |     |     |     |   |   |   |   |   |   |   |   |   |
| 6    | 9   | 1.09 | 1.09 | 19  | 19  | 19  | 1 | 1 | 1 | 0 | 0 | 0 | 4 | 4 | 4 |
| 95.1 | 1.0 |      |      |     |     |     |   |   |   |   |   |   |   |   |   |
| 4    | 4   | 1.04 | 1.04 | 16  | 16  | 16  | 2 | 2 | 2 | 0 | 0 | 0 | 2 | 2 | 2 |
